# Supplementary material for: Do Vegetarian Diets Provide Adequate Nutrient Intake during Complementary Feeding? A Systematic Review
Source: MDPI journal article supplement (doi:10.3390/nu14173591), 2022-08-31

## Supplementary file S4. ADDITIONAL ANALYSIS OF THE RESULTS

### 1. Growth and risk of overweight / obesity in the age of complementary feeding in children on a diet lacking animal protein compared to omnivorous children

#### Analysis 1.1. Risk of wasted growth

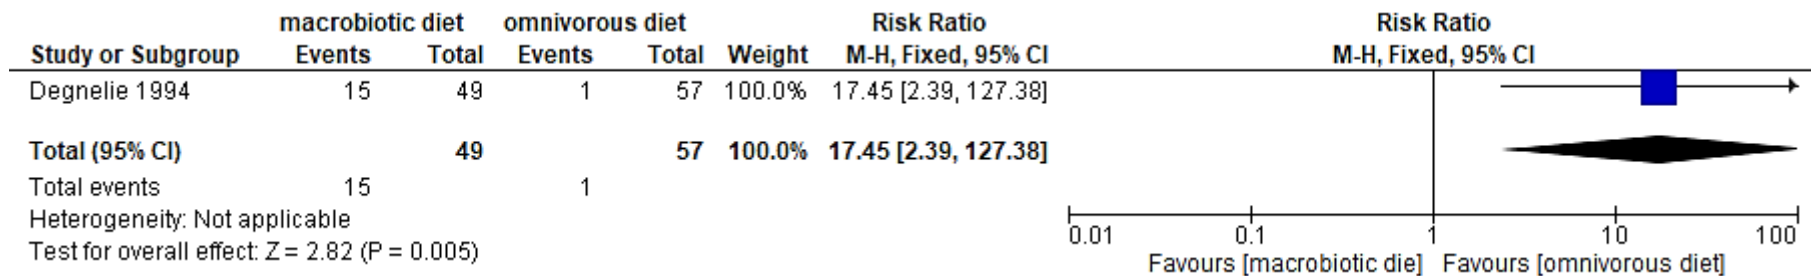

#### Analysis 1.2. Risk of stunted or wasted growth

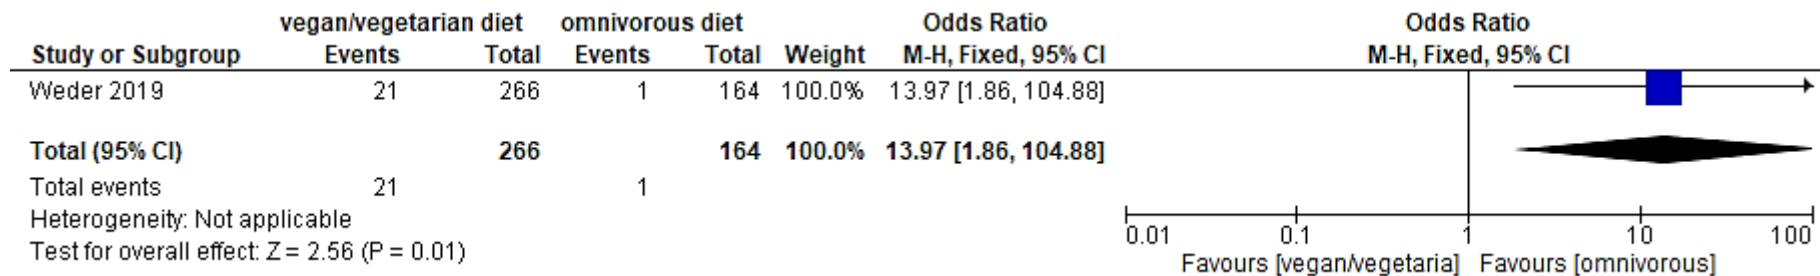

### Analysis 1.3. Risk of overweight / obesity

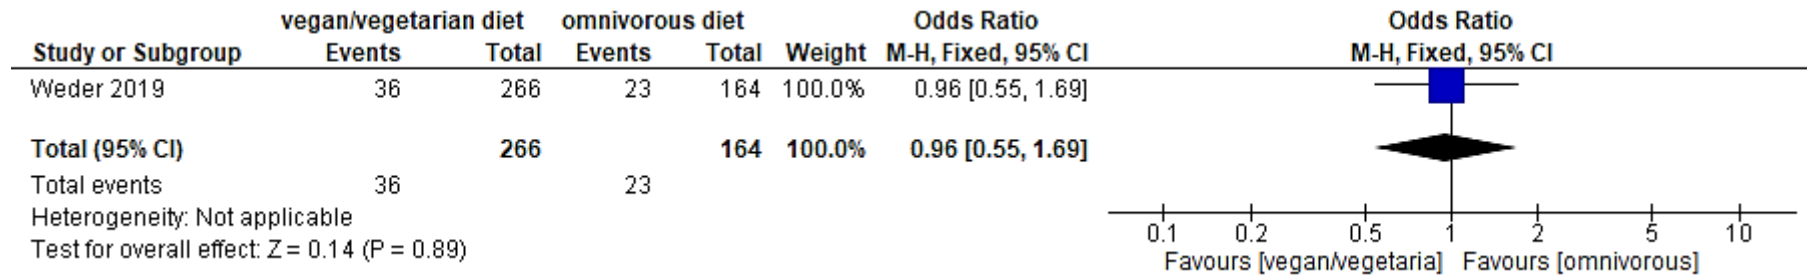

Supplement: s1 [file s1]
