# Supplementary material for: Do Vegetarian Diets Provide Adequate Nutrient Intake during Complementary Feeding? A Systematic Review
Source: Nutrients. 2022 Aug 31;14(17):3591. doi: 10.3390/nu14173591 (PMC9459879; doi:10.3390/nu14173591)
Supplement: Supplementary file 1 [file nutrients-14-03591-s001.zip]

Archive with 5 entries (5 files):
- nutrients_1869505_Supplementary file S1.pdf
- nutrients_1869505_Supplementary file S2.pdf
- nutrients_1869505_Supplementary file S3.pdf
- nutrients_1869505_Supplementary file S4.pdf
- nutrients_1869505_Supplementary file S5.pdf
